Classification: BIOLOGICAL SCIENCES: Genetics

Title: CaMK (CMK-1) and O-GlcNAc transferase (OGT-1) modulate mechanosensory responding and habituation in an interstimulus interval-dependent manner in *Caenorhabditis elegans*

Authors: Tiffany A. Timbers<sup>1</sup>, Evan L. Ardiel<sup>1</sup>, Troy A. McDiarmid<sup>1</sup>, Kirsten C. Y. Lee<sup>1</sup>, Javad Safaei<sup>3</sup>, Steven L. Pelech<sup>4</sup>, and Catharine H. Rankin<sup>1,2</sup>

1. Djavad Mowafaghian Centre for Brain Health, University of British Columbia, 2211 Wesbrook Mall, Vancouver, British Columbia, V6T 2B5 Canada
2. Department of Psychology, University of British Columbia, 2136 West Mall, Vancouver, British Columbia, V6T 1Z4 Canada
3. Department of Computer Science, University of British Columbia, 2366 Main Mall, Vancouver, British Columbia, V6T 1Z4 Canada
4. Department of Medicine, University of British Columbia, 2775 Laurel Street, Vancouver, British Columbia, V5Z 1M9 Canada  
Kinexus Bioinformatics Corporation, Suite 1, 8755 Ash Street, Vancouver, British Columbia, V6P 6T3 Canada

Short Title: CaMK and OGT modulate mechanoresponding and learning

Correspondence concerning this article should be addressed to: Catharine H. Rankin  
Djavad Mowafaghian Center for Brain Health and Department of Psychology  
University of British Columbia  
2136 West Mall,  
Vancouver, British Columbia  
Canada, V6T 1Z4  
email: [crankin@psych.ubc.ca](mailto:crankin@psych.ubc.ca)  
phone: 604-822-5449  
fax: 604-822-7299

Keywords:

Learning, O-GlcNAc, OGT, CaMK1, CaMK4, CMK-1, *C. elegans*, Non-associative learning, Habituation, Mechanosensation, Calmodulin-dependent kinase

## Abstract (250 words)

1 Many aspects of neural physiology, including processes that underlie learning (*e.g.* neurotransmitter  
2 release and long-lasting changes in synaptic strength), are regulated by brief and local changes in [ $\mu\text{m}$ ]  
3 levels of free intracellular  $\text{Ca}^{2+}$ . On this scale, changes in [ $\text{Ca}^{2+}$ ] are known to activate many  $\text{Ca}^{2+}$ -  
4 sensors, including the  $\text{Ca}^{2+}$ /calmodulin-dependent kinases (CaMKs). Although CaMK4 is known to  
5 function in long-term memory and its paralog, CaMK1, in nervous system development, there is no  
6 evidence indicating that they function in learning acquisition. Here we reveal that the *Caenorhabditis*  
7 *elegans* ortholog of CaMK1/4, CMK-1, regulates responses to mechanical stimuli and learning,  
8 specifically habituation, a conserved form of non-associative learning. The habituation phenotypes of  
9 *cmk-1* mutants are sensitive to interstimulus interval (ISI), such that *cmk-1* mediates habituation rate at  
10 short ISIs and habituation level at long ISIs. This is the first *in vivo* evidence that CaMK1/4 functions  
11 to modulate learning acquisition in awake, behaving animals and provides direct evidence to support  
12 the hypothesis that different mechanisms mediate habituation learning at different ISIs. From catalytic  
13 site analysis of the human and *C. elegans* CaMKs, we predicted potential CaMK phosphorylation  
14 targets and, through mutation studies, identified one of these, O-linked N-acetylglucosamine (O-  
15 GlcNAc) transferase, OGT-1, as also being necessary for wild-type responses to mechanical stimuli  
16 and learning. Detailed behavioral analysis of single and double mutants suggests that CMK-1 and  
17 OGT-1 function in parallel pathways that may converge on a common substrate to modulate the tap  
18 response. Our results provide the first evidence of a role for CaMK and O-GlcNAc post-translational  
19 modification in responding to mechanical stimuli and learning, which are fundamental biological  
20 processes present in all animals.

21

22

23

## 24 **Introduction**

25            Learning is a fundamental biological process by which organisms update and modify their  
26 behavioral output to sensory stimuli based on past experience. This important phenomenon allows  
27 organisms to adapt their behavior to best suit the current conditions in the inconstant environment.  
28 Brief and local changes in micromolar concentration levels of free intracellular  $\text{Ca}^{2+}$  play a critical role  
29 in modifying many aspects of neural physiology such as learning. Changes in  $[\text{Ca}^{2+}]$  on this scale are  
30 known to activate many  $\text{Ca}^{2+}$ -sensors, including the important and ubiquitously expressed protein  
31 calmodulin (CaM). Once bound with four  $\text{Ca}^{2+}$  ions, CaM ( $\text{Ca}^{2+}/\text{CaM}$ ) is known to regulate many  
32 different signaling proteins, including the CaM-kinase (CaMK) family of protein-serine/threonine  
33 kinases, which are highly expressed in the nervous system. Within the larger CaMK group (consists of  
34 ~ 23 kinase families) the CaMK1 family (consisting of CaMKK, CaMK1 and CaMK4; reviewed in 1)  
35 has been shown to play important roles in the context of nervous system development and plasticity.

36            CaMKK is purported to function upstream of both CaMK1 and CaMK4 by phosphorylating Thr  
37 residues in the activation site of these kinases to increase their  $\text{Ca}^{2+}/\text{CaM}$ -dependent  
38 phosphotransferase activities (2, 3). The substrate recognition motifs of numerous protein kinases have  
39 significant overlap and correct target specificity is thought to also be regulated by localization of the  
40 kinase and its substrates within the cell (4); this has been established for CaMK1 and CaMK4 (5).

41            CaMK4's expression is usually restricted to the nucleus (6-8), where it has been shown to  
42 regulate gene transcription during the induction of long-term synaptic plasticity and long-term memory  
43 in rodents (9-11). In contrast, CaMK1's expression has been observed to be cytoplasmic in most cases  
44 (12). Many studies have demonstrated an important role for CaMK1 in the developing mammalian  
45 nervous system, specifically regulating axonal growth cone motility and axonal outgrowth (13),  
46 dendritic arborization (14-16), and formation of dendritic spines and synapses (17).

47 More recent studies have attempted to ascertain whether CaMK1 plays a role in plasticity of the  
48 nervous system; Schmitt *et al.* (18) investigated the role of CaMKK, CaMK1 and CaMK4 in long-term  
49 potentiation (LTP) and demonstrated that CaMKK and CaMK1, but not CaMK4, play a role in  
50 activating Ras-extracellular signal-regulated protein kinase (Ras-ERK) signaling during early-phase  
51 LTP in hippocampal neuron cultures. Using the same experimental preparation, Guire *et al.* (19) went  
52 on to demonstrate that CaMK1 also functions during LTP to recruit calcium permeable AMPA  
53 receptors. These studies indicate that similar to CaMK4, CaMK1 might also function in plasticity and  
54 perhaps learning and memory, but unlike CaMK4 it most likely functions near the synapse and in  
55 shorter forms of plasticity. To date, no one has directly tested whether CaMK1 plays a role in plasticity  
56 or learning and memory in any organism *in vivo*.

57 The nematode *Caenorhabditis elegans* responds to a non-localized mechanosensory stimulus, a  
58 tap to the side of the Petri plate it inhabits, by performing a reversal (changing from forward to  
59 backward locomotion). In wild-type worms, repeated administration of the tap stimulus results in  
60 habituation, a form of non-associative learning, which can be observed as a decrease in both the size of  
61 the reversal (response magnitude) and the likelihood of responding (response probability) (20, 21).

62  $Ca^{2+}$  has been shown to be an important modulator of tap habituation in *C. elegans* (22, 23).  
63 Repeated mechanical stimulation resulted in an attenuation of the  $Ca^{2+}$  transient that followed each  
64 mechanical stimulus (23). Chelation of the tap-induced  $Ca^{2+}$  transient resulted in more rapid  
65 habituation, as did mutations in the genes encoding the calcium signaling molecules calreticulin (*crt-1*)  
66 and the inositol triphosphate receptor (*itr-1*: 22). Despite the obvious importance of  $Ca^{2+}$  signaling in  
67 this phenomenon, components of the CaMK cascade have yet to be tested for their role in habituation.  
68 The catalytic activity of proteins in this signaling cascade are dependent upon increases in intracellular  
69  $Ca^{2+}$  concentration (which occurs in response to tap), are highly expressed in the nervous system, and  
70 have been shown to be important for cellular models of plasticity and long-term memory (reviewed in  
71 24). Thus we hypothesized that this cascade may also function in learning in *C. elegans*, specifically in

72 tap habituation.

73 The *C. elegans* genome encodes a single homolog each of CaMKK, *ckk-1*, and CaMK1/4, *cmk-*  
74 *1* (25). Both genes are expressed in the nervous system and strains with mutations in these genes appear  
75 superficially wild-type (26), however several exciting studies have recently characterized molecular  
76 mechanisms underlying behavioral deficits related to experience-dependent thermotaxis and heat  
77 avoidance (27; 28; 29). We found that *C. elegans* strains carrying mutations in *cmk-1*, but not *ckk-1*,  
78 exhibited larger responses to mechanical stimuli and a higher final habituated level of responding than  
79 wild-type animals when stimuli were presented every sixty seconds. Intriguingly, the initial response  
80 and final habituated level phenotypes of *cmk-1* mutants were genetically dissociable and sensitive to  
81 the interstimulus interval (ISI) at which the mechanosensory stimuli were presented. This is the first *in*  
82 *vivo* evidence that CaMK1/4 functions to modulate learning acquisition in awake, behaving animals  
83 and provides direct evidence to support the hypothesis that different mechanisms mediate habituation  
84 learning at different ISIs (Rankin and Broster, 1992). A screen for downstream targets of CMK-1  
85 predicted from bioinformatics analysis of the human and *C. elegans* CaMK catalytic domains led to the  
86 identification of the *C. elegans* O-linked N-acetylglucosamine (O-GlcNAc) transferase homolog, OGT-  
87 1, as also functioning in responding to mechanical stimuli and tap habituation. Thus, we demonstrate  
88 novel roles for posttranslational O-GlcNAc modification of proteins in responding to mechanical  
89 stimuli and *in vivo* learning.

90

## 91 **Results**

### 92 **CMK-1 Modulates the Rate of Habituation at Short Interstimulus Intervals (10s) and the Final** 93 **Habituated Level of Responding at Long Interstimulus Intervals (60s)**

94 To determine whether CaMKs function in learning we examined habituation to repeated tap  
95 stimuli by the *C. elegans* putative null mutants of mammalian CaMK1/CaMK4, *cmk-1(oy21)*, and  
96 CaMKK, *ckk-1(ok1033)*, homologs. Wild-type worms habituate to repeated tap stimuli by decreasing

97 the distance they reverse (20, 21). *ckk-1(ok1033)* mutant worms responded initially and habituated  
98 similarly to wild-type worms at both 10 and 60 s ISIs (pNS for all, Fig. 1A-B). In contrast, *cmk-1*  
99 mutant worms displayed larger initial responses to tap ( $p < 0.001$ , Fig. 1A) and habituation deficits  
100 dependent on the rate at which stimuli were delivered. If stimuli were administered at a 60 s ISI, a  
101 larger tap response was apparent across training ( $p < 0.001$ ; Fig. 1A), however if stimuli were presented  
102 every 10 s, the *cmk-1* mutant habituated faster (greater rate of response decrement) than wild-type, but  
103 to an asymptotic level indistinguishable from wild-type (pNS; Fig. 1B). Therefore, the elevated final  
104 reversal distance habituation level in *cmk-1* mutants (Fig. 1A) is not caused by a general increase in  
105 responding, but instead is specific to the stimuli being delivered at a 60s ISI. Wild-type habituation to  
106 tap stimuli presented at a 60s ISI was restored in *cmk-1(oy21)* mutant worms expressing wild-type  
107 CMK-1 cDNA under control of its endogenous promoter (N2 vs. rescue pNS; Fig. 1C); confirming  
108 *oy21* as the causative allele.

109 Age is an important factor that modulates habituation (30), but the habituation phenotype of  
110 *cmk-1* mutants was unlikely to be due to differences in growth or aging, as the mutant worms began  
111 egg-laying at a similar time as wild-type worms (data not shown). Additionally, the difference in  
112 habituation between *cmk-1* mutant and wild-type worms at a 60s ISI was present regardless of which  
113 day of adulthood the worms were tested on ( $p < 0.05$ ; Fig. S1 and S2). Note that in younger adults, the  
114 initial responses are of normal size, but the habituated responses are larger (Fig. S1), dissociating the  
115 initial and final response metrics. This further suggests that *cmk-1* modulates habituation in an ISI-  
116 dependent manner, as the *cmk-1* mutant displayed an altered final habituated level of responding at a  
117 60s ISI and altered rate of habituation at a 10s ISI, even at an age where the increased initial response  
118 phenotype of *cmk-1* mutants is not present (Fig. S1).

119  
120 **Loss of CMK-1 phosphorylation site (T179) recapitulates null allele**

121 Although previous studies suggested that CaMKK stimulates the kinase activity of CaMK1/4,  
122 our results indicate that CMK-1, but not CKK-1, functions in habituation. Consistent with this  
123 assertion, the expression pattern of *cmk-1* is broader than *ckk-1* (26) and we found that *cmk-1*, but not  
124 *ckk-1*, was expressed in the touch receptor neurons and interneurons of the tap withdrawal circuit (Fig.  
125 S3). This suggests that either (i) activation of CaMK by calmodulin alone may be sufficient to activate  
126 the kinase in the context of some biological signaling, and/or (ii) CaMK is activated via  
127 phosphorylation by another unidentified kinase. To test these hypotheses we took advantage of a *cmk-1*  
128 point mutant (*gk691866*) whose conserved CaMKK phosphorylation site, Threonine-179 (T179; 2, 3),  
129 was mutated to an isoleucine (I) and could therefore no longer be phosphorylated. We performed a  
130 complementation test between the *cmk-1(gk691866)* point mutant, T179I, and the *cmk-1(oy21)* null  
131 mutant and reasoned that if these alleles complemented in the context of habituation it would indicate  
132 that phosphorylation of T179 was not required for wild-type habituation. Interestingly, we observed  
133 that compared to wild-type worms and *cmk-1(oy21/+)* heterozygotes, *cmk-1(oy21/gk691866)*  
134 heterozygote mutants showed significantly increased responding to the initial tap ( $p=0.05$  and  $p<0.001$ ,  
135 respectively) and a higher final level of habituation to tap stimuli ( $p<0.01$  and  $p<0.001$ , respectively);  
136 indicating that these alleles failed to complement (Fig. 2). Thus, these data support a role for  
137 phosphorylation of T179 as being necessary for wild-type responding to mechanical stimuli and  
138 habituation. Furthermore, because we demonstrated above that CKK-1 does not function in habituation,  
139 CMK-1 must be activated via T179 phosphorylation by another, as yet unidentified, kinase.

#### 140 141 **Genetic dissociation of initial response and habituation phenotypes**

142 In mammals, the orthologs of CMK-1, CaMK1 and CaMK4, localize to different subcellular  
143 compartments (the cytoplasm and the nucleus, respectively). Consistent with previous reports (Schild et  
144 al., 2014), we found that CMK-1::GFP fusion proteins localize to the cytoplasm in cell bodies and  
145 neurites and are largely excluded from the nucleus (Fig. 3A). In a screen for noxious heat avoidance

146 defects, Schild et al. (2014) isolated a *cmk-1* gain-of-function allele, *pg58*, which encodes a truncated  
147 protein lacking most of its regulatory domain and a nuclear export sequence (NES), but with an intact  
148 kinase catalytic domain. As had been observed with a similar mutation in mammalian CaMKI  
149 (Stedman et al., 2004), Schild et al. (2014) found that truncated CMK-1(1-304) abnormally  
150 accumulated in the nucleus. In their model, CMK-1 shuttles between cytoplasm and nucleus to  
151 modulate noxious heat avoidance. To test whether a similar process mediated habituation to tap, we  
152 evaluated learning in the *cmk-1(pg58)* mutant. Although they had a large initial response to tap  
153 ( $p < 0.05$ ; Fig. 3B) the final habituated response size of *cmk-1(pg58)* was indistinguishable from wild-  
154 type (pNS; Fig. 3B), suggesting appropriate subcellular localization is essential for setting naïve  
155 responsivity to tap, but not necessarily modulating it. By dissociating the initial response and  
156 habituation phenotypes of the *cmk-1* mutant, results from this allele confirm they are independent  
157 metrics.

158

## 159 **Identification of Candidate CMK-1 Target Proteins Through Analysis of Evolutionarily** 160 **Conserved Predicted CaMK Phosphosites**

161 Protein kinases recognize the specific Ser/Thr/Tyr amino acid residues that they phosphorylate  
162 on their target substrates based upon the sequence of residues that flank the phosphoacceptor site  
163 (comprises the kinase consensus sequence). This is due to kinase-substrate binding following a lock  
164 and key model, whereby the peptide sequence flanking the phosphosite on the target protein fits into  
165 the catalytic domain of the kinase, because of the presence of specificity-determining residues located  
166 there which often directly interact with the side chains of amino acid sequences surrounding  
167 phosphosites in substrates (32). These principles have been previously used to predict the kinase  
168 substrate specificities of 492 human protein kinases in silico (33).

169 The computational methods have now been further improved with refinements of the original  
170 algorithms and training data from over 10,000 kinase-protein phosphosite pairs and 8,000 kinase-



171 peptide phosphosite pairs. We used these updated methods to generate a kinase substrate specificity  
172 prediction matrix (KSSPM) for *C. elegans* CMK-1 based on the primary amino acid sequence of its  
173 catalytic domain, and then used this KSSPM to query all of the 20,470 known *C. elegans* protein  
174 sequences to identify those proteins that featured the top 600 highest scoring predicted phosphosites  
175 (Table S1). Next, we identified the closest human cognate proteins that featured similar phosphosites,  
176 and then scored the human phosphosites with KSSPMs for all four human CaMK1 isoforms and  
177 CaMK4 (which share 65% and 44% sequence identity, as measured by Blastp, with the *C. elegans*  
178 CMK-1 protein, respectively; Fig. S4). Of particular interest were those *C. elegans* protein and  
179 phosphosites that were highly conserved in *Homo sapiens* and predicted to be targeted by human  
180 CaMK1 isoforms and CaMK4. Such high evolutionary conservation would support important  
181 functional roles for these kinase-substrate pairs. More information about the predicted phosphorylation  
182 of these human phosphosites by human protein kinases and their evolutionary conservation in over 20  
183 other species is available in the PhosphoNET website at [www.phosphonet.ca](http://www.phosphonet.ca).

184         The above-generated list of 600 phosphosites in 373 *C. elegans* proteins predicted to be CMK-1  
185 targets was used to prioritize candidates. Candidates that had been previously shown to interact with  
186 CaMKs for which testable knockout mutant alleles were available were of highest interest, as well  
187 those ranked within the top 20 by p-site score and assayed them for habituation at a 60 s ISI. Out of the  
188 22 mutants tested to date, 17 were observed to show an initial response and/or habituation phenotype  
189 (Fig. S5, S6 and (Table 1). A Venn diagram was generated that grouped genes that when mutated  
190 showed similar behavioral phenotypes (Fig. 4).

191

## 192 **O-GlcNAc transferase, OGT-1, Functions in Habituation and is Expressed in the Nervous** 193 **System, including the Touch Receptor Neurons**

194         *ogt-1* mutants showed an initial mechanosensory response and habituation phenotype that was  
195 strikingly similar to *cmk-1* mutants; *ogt-1(ok430)* mutants were significantly more responsive to the

196 initial tap ( $p < 0.001$ ), and showed significantly higher final level of habituation to stimuli delivered at a  
197 60s ISI ( $p < 0.001$ ; Fig. 5A, Table 1). Because of this we further investigated the role of this protein in  
198 habituation by assaying whether OGT-1 was also similar to CMK-1 in its ISI dependency (*i.e.* whether  
199 it mediated distinct aspects of habituation at a 10s ISI versus a 60s ISI). When we habituated *ogt-*  
200 *l(ok430)* mutants at a 10s ISI instead of a 60s ISI, we observed that they were still more responsive to  
201 the initial tap ( $p < 0.001$ ), but they habituated more rapidly and to the same final level as wild-type  
202 worms in the measure of reversal distance (pNS; Fig. 5B). Thus, *ogt-1* mutants robustly phenocopy  
203 *cmk-1* mutants in all measures tested. Importantly, Hanover *et al.* (34) has demonstrated that the *ogt-*  
204 *l(ok430)* allele is a true null and results in the complete loss of function of this transferase; in *ogt-*  
205 *l(ok430)* mutants O-glycNAc is absent. This was shown via direct measurement of O-GlcNAcitol  
206 released after alkaline  $\beta$ -elimination and by O-GlcNAc antibody staining (34).

207 We next confirmed that the mutation in *ogt-1, ok430*, was indeed the mutation which caused the  
208 mechanoresponding and habituation phenotypes observed above by testing a second null allele of *ogt-*  
209 *l, tm1046*. Tm1046 is a 466 bp deletion, resulting in a frameshift and an early stop after 392 amino  
210 acids. *ogt-1(tm1046)* mutants displayed an initial response ( $p < 0.001$ ) and habituation phenotype  
211 ( $p < 0.001$ ) similar to *ogt-1(ok430)* null mutants (Fig. 5; data not shown), thus demonstrating that OGT-  
212 1 function is critical for wild-type responses to tap and habituation.

213 To evaluate the expression pattern of *ogt-1* we created a transcriptional reporter that consisted  
214 of ~2 kb of the *ogt-1* promoter fused to GFP (*Pogt-1::GFP*) and injected this into wild-type worms.  
215 Imaging of this reporter revealed that OGT-1 is expressed quite broadly across the nervous system,  
216 including the touch cells, in addition to muscles and seam cells (Fig. 5C).

217

### 218 ***cmk-1* and *ogt-1* Exhibit a Complex Genetic Interaction**

219 To test whether *cmk-1* and *ogt-1* interact genetically we assayed the habituation of *cmk-1(oy21)*;  
220 *ogt-1(ok430)* double mutants. When these double mutants were habituated at a 60s ISI they acted

221 additively to give significantly larger initial responses ( $p < 0.001$  for both) and larger reversal distance  
222 habituation phenotypes than that of either single mutant ( $p < 0.01$  for both; Fig. 6A). The most  
223 parsimonious explanation of this data is that each mutation contributes to the habituation phenotype  
224 through disruption of independent genetic pathways. This result was surprising given that the  
225 individual mutant phenotypes were so strikingly similar and that the mammalian homologues of these  
226 proteins have been shown to interact (35, 36). Because the response distance variable is actually  
227 composed of two different measures, reversal speed and reversal duration, we decided to further  
228 analyze their relationship by breaking reversal distance down into these two components and  
229 examining their habituation (Fig. 6B and 6C).

230 For the initial response to tap, the *cmk-1* single mutant exhibited significantly faster reversals  
231 (Fig. 6B) of increased duration (Fig. 6C) compared to wild-type. In contrast, the *ogt-1* mutant reversed  
232 at a speed similar to wild-type (Fig. 6), but with a duration longer than even the *cmk-1* mutant (Fig.  
233 6C). Thus, the single mutant data indicate that the similar reversal distance phenotype of unhabituated  
234 *cmk-1* and *ogt-1* mutants was caused by distinct processes, with CMK-1 primarily influencing speed of  
235 reversals and modestly influencing reversal duration, and OGT-1 influencing duration, but not speed.  
236 However, *cmk-1; ogt-1* double mutants performed significantly slower reversals than *cmk-1* single  
237 mutants ( $p < 0.001$ ), almost indistinguishable from wild-type ( $p = 0.04$ ), indicating that *ogt-1* may act as a  
238 suppressor of *cmk-1* for reversal speed in naïve animals (Fig. 6B). Thus, in the context of responding to  
239 an initial mechanical stimulus, there appears to be some interaction between the *cmk-1* and *ogt-1*  
240 pathways.

241 In the case of habituated animals, both *cmk-1* and *ogt-1* single mutants exhibited significantly  
242 faster reversals compared to wild-type and a consistent, but not significant trend towards increased  
243 duration, phenotypes which were additive, giving the rapid and long-lasting final responses of the *cmk-*  
244 *1; ogt-1* double mutant.

245

246

247 **Discussion**

248 We report here that the *C. elegans* CMK-1, but not CKK-1, mediates habituation to  
249 mechanosensory stimuli in an ISI-dependent manner. Through catalytic site analysis of CaMKs we  
250 predicted and screened potential CaMK phosphorylation targets to identify the null OGT mutant, *ogt-1*,  
251 as also functioning in this form of learning. We showed that similar to *cmk-1*, *ogt-1* mutants altered  
252 habituation in an ISI-dependent manner. Finally, we assayed the tap habituation of *cmk-1(oy21); ogt-*  
253 *1(430)* double mutants and found that these two genes have a complex genetic interaction in the context  
254 of naïve responding, yet exhibit an additive habituation phenotype.

255 While many previous studies have suggested that CaMK1/4 and CaMKK can function in the  
256 same pathway, our results indicate that CMK-1, but not CKK-1, functions in responses and habituation  
257 to mechanical stimuli are not the first findings to indicate that CaMK1/4 can function independently of  
258 CaMKK. In *C. elegans*, Kimura *et al.* (26) found that CMK-1 is expressed in more neurons than is  
259 CKK-1 and that although CKK-1 enhanced the CMK-1- dependent phosphorylation of a transcription  
260 factor (CREB), CMK-1 was able to phosphorylate CREB in the absence of CKK-1. Similarly, Satterlee  
261 *et al.* (37) found that CMK-1, but not CKK-1, functioned to regulate AFD sensory neuron specific gene  
262 expression in *C. elegans*. These findings also appear to be consistent with studies in vertebrate  
263 organisms where CaMK1 is known to have a wider expression profile than CaMKK (reviewed in 38).  
264 These data indicate that either in some cases (i) activation of CaMK1/4 by calmodulin alone may be  
265 sufficient to activate the kinase in the context of some biological signaling or (ii) CaMK1/4 is activated  
266 via phosphorylation by another unidentified kinase. Although these possibilities are not necessarily  
267 mutually exclusive, our results that showed that the *cmk-1(gk691866)* point mutant, T179I, and the  
268 *cmk-1(oy21)* null mutant fail to complement in the context of naïve mechanosensory responding and  
269 habituation indicate that, at least in this organism and these phenotypes, CMK-1 is activated via  
270 phosphorylation by another as yet unidentified kinase. Future work is aimed at identifying the cellular

271 and subcellular site of action for CMK-1 and OGT-1. A mutant with mislocalized CMK-1 responded  
272 initially with large reversals, but habituated normally, suggesting a shuttling of CMK-1 into the nucleus  
273 does not mediate tap habituation, as it does heat avoidance (28).

274 To find downstream targets of CMK-1 in *C. elegans* we used a novel bioinformatics approach  
275 to generate a list of protein candidates predicted to be phosphorylated by CMK-1 to screen for tap  
276 response and habituation phenotypes, similar to those observed in *cmk-1* mutants. Our bioinformatics  
277 approach to generate a list enriched in proteins that were likely to function in either responding to  
278 mechanical stimuli and/or mechanosensory habituation used an effective kinase substrate prediction  
279 algorithm developed by Safaei and colleagues (33). Behaviorally screening strains with mutations in  
280 our top candidates, we found that this list was indeed enriched for mutations which cause tap response  
281 and/or habituation deficits, as 17/22 strains deviated from wild-type in some aspect of these behaviors.  
282 Thus this approach appears to be an effective method to identify downstream candidates for  
283 phosphorylation targets of kinases in the context of mechanosensory responding and learning.

284 By screening knockout mutants from among the top candidates of the CaMK phosphosite  
285 substrate prediction, we found that the *C. elegans* O-GlcNAc transferase (OGT) mutants, *ogt-1*,  
286 displayed strikingly similar phenotypes compared to *cmk-1* mutants. O-GlcNAc glycosylation is a  
287 unique and dynamic cytosolic and nuclear carbohydrate post-translational modification in which  $\beta$ -N-  
288 acetylglucosamine is covalently attached to serine or threonine residues of proteins. In contrast to other  
289 forms of glycosylation, O-GlcNAc glycosylation occurs intracellularly, is rapid (occur as quickly as 1-  
290 5 min after cellular stimulation; 35, 39) and is not further modified into complex glycans. Hence, it is  
291 thought to be more akin to phosphorylation than to other forms of glycosylation. Interestingly, O-  
292 GlcNAc glycosylation sometimes occurs on or near serine or threonine residues that are also known to  
293 undergo phosphorylation (reviewed in 40). Both OGT and O-GlcNAcase (enzyme that functions in  
294 opposition to OGT to remove  $\beta$ -N-acetylglucosamine residues; OGA) are highly expressed in the brain  
295 (41, 42) and enriched at synapses within neurons (43,44).

296 In *C. elegans*, although OGT-1 is expressed in the embryonic nervous system (45) no role has  
297 yet been described for this protein in responding to mechanosensory stimuli or learning. Instead,  
298 studies have shown that it functions in macronutrient storage (34), dauer formation (46), lifespan (47),  
299 the glucose stress response (48) and proteotoxicity in *C. elegans* neurodegenerative disease models  
300 (49). In other species a role for O-GlcNAc glycosylation has yet to be demonstrated *in vivo* for learning  
301 acquisition, but it has been shown to function in long-term memory (50) and in cellular models of  
302 plasticity such as: long-term potentiation (LTP), long-term depression (51) and paired-pulse facilitation  
303 (52). Thus, our evidence of an *in vivo* requirement for OGT-1 in learning in *C. elegans* will very likely  
304 be conserved in learning in other species, including mammals.

305 Epistasis experiments measuring reversal distance revealed the *cmk-1(oy21); ogt-1(430)*  
306 double mutant phenotype to be additive for both naïve and habituated states. Additivity is most often  
307 thought to be suggestive of a sign of the absence of a functional relationship between the mutated genes  
308 under study but in some cases it may be due to both gene products converging on the same downstream  
309 target(s), and/or non-linear dynamics of regulatory networks (53).

310 Although, clearly, the most parsimonious explanation for the additive genetic interaction  
311 between null mutations in *cmk-1* and *ogt-1* is that each mutation contributes to the habituation  
312 phenotype through disruption of at least two contributing independent linear biochemical pathways;  
313 data from previous studies have revealed that there is much complex cross talk between O-GlcNAc and  
314 phosphorylation signaling, and thus it is tempting to speculate that the relationship between CMK-1  
315 and OGT-1 may be more intimate. Given that (i) *cmk-1* and *ogt-1* mechanosensory responding and two  
316 different habituation phenotypes were so strikingly similar, (ii) mammalian CaMK4 and OGT interact  
317 (CaMK4 phosphorylates OGT (35), and OGT can add O-GlcNAcs to CaMK4 (36)), (iii) mammalian  
318 CaMK4 and OGT are known to share several common substrates (CREB, serum response factor, the  
319 CREB-binding protein, and OGT itself; 36, 54, 55-57), and (iv) virtually every other O-GlcNAcylated

320 protein identified (> 250) has also been shown to be a phosphoprotein (i.e. it is phosphorylated by a  
321 kinase; 58, 59) we hypothesized that the additive phenotypes of *cmk-1*; *ogt-1* double mutants may be  
322 caused by CMK-1 and OGT-1 sharing a downstream substrate and/or functioning in a non-linear  
323 genetic pathway.

324 To test this hypothesis, we further analyzed this genetic interaction by separating reversal  
325 distance into its two components, reversal speed and reversal duration, for both naïve and habituated  
326 mechanosensory responses. The clearest conclusion can be drawn from the double mutant data in the  
327 context of responding to tap stimuli. When naïve reversal speed is measured, *cmk-1*; *ogt-1* double  
328 mutants perform significantly slower reversals than *cmk-1* single mutants, very similar to wild-type,  
329 indicating that *ogt-1* acts as a suppressor of *cmk-1*. Because the *cmk-1(oy21)* allele used in these  
330 experiments is very likely a null allele, these data support the existence of *ogt-1* functions downstream  
331 of *cmk-1* to negatively regulate the pathway in wild-type animals. When naïve reversal duration is  
332 measured, the *cmk-1*; *ogt-1* double mutant phenotype is synergistic. Synergy in double mutants  
333 affected in two non-homologous genes can be a consequence of genes disrupting steps of pathways that  
334 converge at some node of a regulatory network, such as sharing a common substrate (reviewed in 60),  
335 suggesting that CMK-1 and OGT-1 share a common downstream target(s).

336 Additionally, a synergistic phenotype is also observed for the baseline locomotory speed in  
337 *cmk-1*; *ogt-1* double mutants measured before mechanosensory stimuli were administered (Fig. S7);  
338 providing additional phenotypic support to our hypothesis that these genetic pathways intersect. In the  
339 context of habituation, the additive habituation phenotypes regardless of the measure in *cmk-1*; *ogt-1*  
340 double mutants indicate that in this context *cmk-1* and *ogt-1* function in two parallel pathways, which  
341 may converge on a common downstream substrate.

342 Using all available published data on CaMK1/4 and OGT as well as from the experiments  
343 performed in this study, we have devised a model for this non-linear genetic network in *C. elegans*

344 (Fig. 7). Biochemical studies, outside of the scope of this work, will be required to validate this  
345 hypothesis.

346 To our knowledge, *cmk-1* and *ogt-1* represent the first reported mechanosensory hypersensitive  
347 mutants in *C. elegans* despite several pioneering genetic screens characterizing harsh and soft touch  
348 mechanosensory defective mutants by Chalfie and colleagues (61,62). Further, we have shown that  
349 *cmk-1(pg58)* mutants also display mechanosensory hyperresponsivity, suggesting that wild-type  
350 shuttling of *cmk-1* between the cytoplasm and the nucleus is necessary for setting response level to  
351 mechanical stimuli – similar to its effects on thermotaxis and heat avoidance (27, 28, 29, 37). Further  
352 characterization of *cmk-1* interacting proteins may identify additional mechanosensory hypersensitive  
353 mutants, an as yet largely uncharacterized family of genes regulating mechanosensation.

354 Finally, our findings identify the first proteins that specifically alter habituation differently at  
355 different ISIs: CMK-1 and OGT-1. Early detailed parametric studies of *C. elegans* mechanosensory  
356 habituation found that the rate and asymptotic level of habituation differed depending on what ISI  
357 stimuli were presented; mechanosensory stimuli which were presented at a 10s ISI resulted in faster  
358 and deeper habituation than stimuli presented at a 60s ISI (20). These experiments led to the hypothesis  
359 that habituation at different ISIs may recruit/require different molecular mechanisms. Our findings that  
360 *cmk-1* and *ogt-1* modulate the final level of habituation at a 60s ISI and the rate of habituation but not  
361 the final level at a 10s ISI are the first published evidence to support this hypothesis.

362 It is important to note that the 60s ISI tap habituation phenotype of *cmk-1* mutants could be  
363 interpreted as a general hyperresponsivity to stimuli throughout the training session, rather than an  
364 alteration in habituation – which is the ability of animals to learn to decrement their responding to  
365 repeated stimulation (63). However, several lines of evidence from this work suggest that CMK-1 alters  
366 habituation. First, when worms were tested at 72 hours post egg lay (Fig. S1; as opposed to 96 hours)  
367 *cmk-1* mutants displayed wild-type initial responses to mechanical stimuli, but a higher final level of  
368 responding at a 60s ISI, dissociating these metrics. Second, *cmk-1* mutants display a normal habituated



369 final level when trained at a 10s ISI – a general hyperresponsive phenotype should be present regardless  
370 of the stimulus interval used (Fig. 1 A-B). Third, the *cmk-1(pg58)* mutant displayed larger initial  
371 responses, but wild-type habituated responses, genetically dissociating these response metrics (Fig.  
372 3B). Taken together, these results suggest that initial and final habituated levels of mechanosensory  
373 responding to tap stimuli are independent metrics and that CMK-1 mediates habituation in an ISI-  
374 dependent manner.

375 In conclusion, our results provide the first *in vivo* evidence of a role for CaMK and O-GlcNAc  
376 post-translational modification in responding to mechanosensory stimuli and learning. Additionally,  
377 our work provides the first direct evidence in support of the hypothesis that multiple mechanisms  
378 mediate habituation at different ISIs and underscores the importance of detailed behavioral genetic  
379 analysis to dissect multiple mechanistically independent components of a seemingly simple learned  
380 behavior. Finally, our findings will help draw much-needed attention to a common form of post-  
381 translational modification that is required for mechanosensory responding and learning, two  
382 fundamental biological processes present in all animals.

383

## 384 **Methods**

385 *Strains and maintenance.* Worms were cultured on Nematode Growth Medium (NGM) seeded with  
386 *Escherichia coli* (OP50) as described previously(64). The following strains were obtained from the  
387 *Caenorhabditis* Genetics Center (University of Minnesota, Minneapolis, MN): N2 Bristol, PY1589  
388 *cmk-1(oy21)*, VC691 *ckk-1(ok1033)*, RB1468 *dkf-2(ok1704)*, VC567 *arf-1.2(ok796)*, VC127 *pkc-*  
389 *2(ok328)*, KG532 *kin-2(ce179)*, RB918 *acr-16(ok789)*, RB818 *hum-1(ok634)*, RB781 *pkc-1(ok563)*,  
390 RB1447 *chd-3(ok1651)*, RB830 *epac-1(ok655)*, HA865 *grk-2(rt97)*, NW1700 *plx-2(ev773)*; *him-*  
391 *5(e1490)*, PR678 *tax-4(p678)*, KG744 *pde-4(ce268)*, RB758 *hda-4(ok518)*, RB1625 *par-1(ok2001)*,  
392 DA596 *snt-1(ad596)*, XA406 *ncs-1(qa406)*, CB109 *unc-16(e109)*, RB653 *ogt-1(ok430)*, BC10002 *dpy-*  
393 *5(e907)* and VC40557 (which harbors *cmk-1(gk691866)* among many other mutations (65)). The

394 following strains were obtained from the National Bioresource Project for the nematode (School of  
395 Medicine, Tokyo Womens Medical Hospital, Shinjuku-ku, Japan): FX01046 *ogt-1(tm1046)*, FX01282  
396 *T23G5.2(tm1282)*, FX03075 *pdhk-2(tm3075)*, FX00870 *nhr-6(tm870)*, FX04733 *syx-6(tm4733)*,  
397 FX05136 *R11A8.7(tm5136)*, and FX02653 *rab-30(tm2653)*.  
398 *Transgenic strains.* The transgenic *C. elegans* strain VH905 *hdIs30[Pglr-1::DsRed2]* was a gift from  
399 H. Hutter (Simon Fraser University, Burnaby, BC). The plasmid containing *Pmec-7::mRFP* was a gift  
400 from J. Rand (University of Oklahoma Health Sciences Center, Oklahoma City, Oklahoma). The  
401 transgenic *C. elegans* strains YT1128 *lin-15(n765)*; *tzEx[Pckk-1::GFP; lin-15(+)]* and YT2016  
402 *tzIs2[Pcmk-1::GFP; rol-6(su1006)]* and plasmids containing *cmk-1* cDNA were gifts from Y. Kimura  
403 (Mitsubishi Kagaku Institute of Life Sciences, Japan). Please see supplemental methods for the primer  
404 sequences for PCR fusion constructs generated for this study.

405 The following strains were created for this work: VG183 *yvEx64[Pcmk-1::GFP; Pmec-*  
406 *7::mRFP]*, VG12 *hdIs30[Pglr-1::DsRed2]*; *tzIs2[Pcmk-1::GFP; rol-6(su1006)]*, VG19 *tzEx[Pckk-*  
407 *1::GFP; lin-15(+)]*; *hdIs30[Pglr-1::DsRed2]*, VG92 *cmk-1(oy21)*; *yvEx49[Pcmk-1::CMK-1; Pmyo-*  
408 *2::GFP]*, VG100 *cmk-1(oy21)*; *yvEx57[Pcmk-1::CMK-1; Pmyo-2::GFP]*, VG260 *yvEx73[Pogt-*  
409 *1::GFP; Pmec-7::RFP; rol-6(su1006)]*, VG214 *yvEx70[Pogt-1::GFP; rol-6(su1006)]* and  
410 VG261 *yvEx74[Pogt-1::GFP; Pmec-7::RFP; rol-6(su1006)]*, VG271 *cmk-1(oy21)*; *dpy-5(e907)*,  
411 VG279 *cmk-1(gk691866)*; *dpy-5(e907)*, VG245 *cmk-1(oy21)*; *ogt-1(ok430)*.

412 *Imaging procedures.* Adult worms were anesthetized in 100 mM NaN<sub>3</sub> dissolved in M9 buffer  
413 containing sephadex beads (G-150-50, Sigma-Aldrich, St. Louis, MO) on glass microscope slides, and  
414 then covered with a 1.5 thick coverslip. An Olympus Fluoview 1000 Confocal microscope was used for  
415 imaging. GFP was excited using a 488 nm wavelength laser setting with light emitted collected through  
416 a 491-515 nm bandpass filter. dsRed and mRFP were excited using a 543 nm wavelength laser setting  
417 with light emitted collected through a 600-630 nm bandpass filter. Optical sections of 0.5 μm thickness  
418 were collected using a 60x oil immersion lens (Olympus). Final figures were generated using Image J

419 version 1.41o (National Institutes of Health, Bethesda, MD) and Adobe Photoshop 7.0 (Adobe  
420 Systems, San Jose, CA).

421 *Behavioral testing of mutant strains.* Worms were synchronized for behavioral testing by picking 5  
422 gravid adults onto a Petri plate containing nematode growth media (NGM) seeded with 50  $\mu$ l of a  
423 liquid culture of OP50 *E. coli* 12-24 hours earlier and letting them lay eggs for 3-4 hours before they  
424 were removed. These eggs were allowed to develop for 96 hours (unless otherwise stated) in a 20°C  
425 incubator. Plates of worms were placed into the tapping apparatus (66) and covered with an optically  
426 transparent lid constructed from a Petri plate lid, non-fogging cover-glass and wax. After a 100s  
427 acclimatization period, 30 taps were administered at either a 60s or a 10s ISI.

428 For CMK-1 rescue strains twelve hours prior to testing, 40-60 worms carrying the selection  
429 marker were transferred using a platinum pick to a fresh NGM plate. Plates were seeded with 50  $\mu$ l of a  
430 liquid culture of OP50 *E. coli* 16-20 hours beforehand.

431 *Complementation test.* Wild-type or *cmk-1(oy21)* males were mated with *dpy-5(e907)* hermaphrodites  
432 homozygous for one of the three *cmk-1* alleles (wild-type, *oy21*, or *gk691866*). Tap habituation  
433 behavior of non-*dpy* F1 progeny was evaluated.

434

435 *Image acquisition of behavior, Behavioral scoring and statistical analysis.* Stimulus delivery and  
436 image acquisition to record the behavior of the worms was done using the Multi-Worm Tracker  
437 (version 1.2.0.2) (66) as described previously (30). Offline data analysis was performed using  
438 Choreography analysis software (version 1.3.0\_r1035 software package) (66) as described previously  
439 (30).

440 Reversal distances and durations in response to tap were compared across strains by statistical  
441 analysis of variance and Tukey honestly significant difference (HSD) tests. Genotype was modeled as a  
442 fixed effect. Petri plate (on which the worms were tested; minimum of 3 Petri plates of ~ 50 worms per

443 experimental condition) was modeled as a random effect nested within the fixed effect. For all  
444 statistical tests an alpha value of 0.05 was used to determine significance. All analysis was performed  
445 using the statistical software programming language, R, and the following R packages: tidyverse,  
446 stringr, nlme, broom and multcomp.

447 Analysis code can be accessed here: [https://github.com/ttimbers/CaMK\\_and\\_OGT-](https://github.com/ttimbers/CaMK_and_OGT-1_modulate_mechanoresponding_and_learning/tree/master/src)  
448 [1\\_modulate\\_mechanoresponding\\_and\\_learning/tree/master/src](https://github.com/ttimbers/CaMK_and_OGT-1_modulate_mechanoresponding_and_learning/tree/master/src)

449

450 *Kinase and phosphosite prediction and evolutionary analyses.* The kinase substrate specificity  
451 prediction matrices (KSSPM) for *C. elegans* CMK-1, human CaMK1 isoforms and human CaMK4  
452 were generated using an updated version of the algorithm originally described in Safaei *et al.* (33). The  
453 *C. elegans* CMK-1 KSSPM was used to score all of the hypothetical peptides predicted surrounding  
454 each of the serine and threonine residues in the 20,470 known *C. elegans* protein sequences. The top  
455 597 scoring phosphopeptides were examined for their conservation in humans using the algorithm  
456 described in Safaei *et al.* (33). The identified human phosphosites were then scored with the KSSPMs  
457 for human CaMK1 isoforms and human CaMK4.

458

#### 459 **Acknowledgements**

460 We would like to thank Angela Leong, Jing Xu and Savannah Nijeboer for help running experiments  
461 and Andrew C. Giles for useful advice and discussions regarding this research. This work was  
462 supported by a Natural Sciences and Engineering Research Council Alexander Graham Bell Canada  
463 Graduate Scholarship to TAT, and by a Natural Sciences and Engineering Research Council Alexander  
464 Graham Bell Canada Graduate Scholarship to ELA, and by a Natural Sciences and Engineering  
465 Research Council Discovery Grant to CHR.

466

#### 467 **References**

468

- 469 1. Soderling TR (1999) The Ca-calmodulin-dependent protein kinase cascade. *Trends Biochem Sci*  
470 24(6):232-236.
- 471 2. Haribabu B, *et al.* (1995) Human calcium-calmodulin dependent protein kinase I: cDNA  
472 cloning, domain structure and activation by phosphorylation at threonine-177 by calcium-  
473 calmodulin dependent protein kinase I kinase. *EMBO J* 14(15):3679-3686.
- 474 3. Kitani T, Okuno S, & Fujisawa H (1997) Studies on the site of phosphorylation of  
475 Ca<sup>2+</sup>/calmodulin-dependent protein kinase (CaM-kinase) IV by CaM-kinase kinase. *J Biochem*  
476 121(4):804-810.
- 477 4. Tsui J, Inagaki M, & Schulman H (2005) Calcium/calmodulin-dependent protein kinase II  
478 (CaMKII) localization acts in concert with substrate targeting to create spatial restriction for  
479 phosphorylation. *J Biol Chem* 280(10):9210-9216.
- 480 5. Lee JC, Kwon YG, Lawrence DS, & Edelman AM (1994) A requirement of hydrophobic and  
481 basic amino acid residues for substrate recognition by Ca<sup>2+</sup>/calmodulin-dependent protein  
482 kinase Ia. *Proc Natl Acad Sci U S A* 91(14):6413-6417.
- 483 6. Jensen KF, Ohmstede CA, Fisher RS, & Sahyoun N (1991) Nuclear and axonal localization of  
484 Ca<sup>2+</sup>/calmodulin-dependent protein kinase type Gr in rat cerebellar cortex. *Proc Natl Acad Sci*  
485 *U S A* 88(7):2850-2853.
- 486 7. Lemrow SM, *et al.* (2004) Catalytic activity is required for calcium/calmodulin-dependent  
487 protein kinase IV to enter the nucleus. *J Biol Chem* 279(12):11664-11671.
- 488 8. Kotera I, *et al.* (2005) Importin alpha transports CaMKIV to the nucleus without utilizing  
489 importin beta. *EMBO J* 24(5):942-951.
- 490 9. Ho N, *et al.* (2000) Impaired synaptic plasticity and cAMP response element-binding protein  
491 activation in Ca<sup>2+</sup>/calmodulin-dependent protein kinase type IV/Gr-deficient mice. *Journal of*  
492 *Neuroscience* 20(17):6459-6472.

- 493 10. Kang H, *et al.* (2001) An important role of neural activity-dependent CaMKIV signaling in the  
494 consolidation of long-term memory. *Cell* 106(6):771-783.
- 495 11. Wei F, *et al.* (2002) Calcium calmodulin-dependent protein kinase IV is required for fear  
496 memory. *Nat Neurosci* 5(6):573-579.
- 497 12. Picciotto MR, Zoli M, Bertuzzi G, & Nairn AC (1995) Immunochemical localization of  
498 calcium/calmodulin-dependent protein kinase I. *Synapse* 20(1):75-84.
- 499 13. Wayman G, Kaech S, Grant W, Davare M, & Impey S (2004) Regulation of Axonal Extension  
500 and Growth Cone Motility by Calmodulin-Dependent Protein Kinase I. *Journal of*  
501 *Neuroscience*.
- 502 14. Wayman G, *et al.* (2006) Activity-dependent dendritic arborization mediated by CaM-Kinase I  
503 activation and enhanced CREB-dependent transcription of Wnt-2. *Neuron* 50(6):897-909.
- 504 15. Takemoto-Kimura S, *et al.* (2007) Regulation of dendritogenesis via a lipid-raft-associated  
505 Ca<sup>2+</sup>/calmodulin-dependent protein kinase CLICK-III/CaMKI $\gamma$ . *Neuron* 54(5):755-770.
- 506 16. Wayman GA, *et al.* (2008) An activity-regulated microRNA controls dendritic plasticity by  
507 down-regulating p250GAP. *Proc Natl Acad Sci U S A* 105(26):9093-9098.
- 508 17. Saneyoshi T, *et al.* (2008) Activity-dependent synaptogenesis: regulation by a CaM-kinase  
509 kinase/CaM-kinase I/betaPIX signaling complex. *Neuron* 57(1):94-107.
- 510 18. Schmitt J, Guire E, Saneyoshi T, & Soderling T (2005) Calmodulin-dependent kinase  
511 kinase/calmodulin kinase I activity gates extracellular-regulated kinase-dependent long-term  
512 potentiation. *Journal of Neuroscience* 25(5):1281-1290.
- 513 19. Guire ES, Oh MC, Soderling TR, & Derkach VA (2008) Recruitment of calcium-permeable  
514 AMPA receptors during synaptic potentiation is regulated by CaM-kinase I. *J Neurosci*  
515 28(23):6000-6009.
- 516 20. Rankin C & Broster BS (1992) Factors affecting habituation and recovery from habituation in  
517 the nematode *Caenorhabditis elegans*. *Behav Neurosci* 106(2):239-249.

- 518 21. Beck CD & Rankin CH (1993) Effects of aging on habituation in the nematode *Caenorhabditis*  
519 *elegans*. *Behavioural Processes* 28(3):145-163.
- 520 22. Kindt K, *et al.* (2007) Dopamine Mediates Context-Dependent Modulation of Sensory Plasticity  
521 in *C. elegans*. *Neuron* 55(4):662-676.
- 522 23. Suzuki H, *et al.* (2003) In vivo imaging of *C. elegans* mechanosensory neurons demonstrates a  
523 specific role for the MEC-4 channel in the process of gentle touch sensation. *Neuron*  
524 39(6):1005-1017.
- 525 24. Wayman GA, Lee YS, Tokumitsu H, Silva A, & Soderling TR (2008) Calmodulin-kinases:  
526 modulators of neuronal development and plasticity. *Neuron* 59(6):914-931.
- 527 25. Eto K, *et al.* (1999) Ca<sup>2+</sup>/Calmodulin-dependent protein kinase cascade in *Caenorhabditis*  
528 *elegans*. Implication in transcriptional activation. *J Biol Chem* 274(32):22556-22562.
- 529 26. Kimura Y, *et al.* (2002) A CaMK cascade activates CRE-mediated transcription in neurons of  
530 *Caenorhabditis elegans*. *EMBO Reports* 3(10):962-966.
- 531 27. Yu Y, *et al.* (2014). CaMKI-dependent regulation of sensory gene expression mediates experience-  
532 dependent plasticity in the operating range of a thermosensory neuron. *Neuron*, 84(5), 919-926.
- 533 28. Schild L, *et al.* (2014). The balance between cytoplasmic and nuclear CaM kinase-1 signaling  
534 controls the operating range of noxious heat avoidance. *Neuron*, 84(5), 983-996.
- 535 29. Kobayashi, *et al.* (2016). Single-cell memory regulates a neural circuit for sensory behavior. *Cell*  
536 *reports*, 14(1), 11-21.
- 537 30. Timbers TA, Giles AC, Ardiel EL, Kerr RA, & Rankin CH (2013) Intensity discrimination  
538 deficits cause habituation changes in middle-aged *Caenorhabditis elegans*. *Neurobiol Aging*  
539 34(2):621-631.
- 540 31. Wicks SR & Rankin CH (1997) Effects of tap withdrawal response habituation on other  
541 withdrawal behaviors: the localization of habituation in the nematode *Caenorhabditis elegans*.  
542 *Behav Neurosci* 111(2):342-353.

- 543 32. Saunders NF, Brinkworth RI, Huber T, Kemp BE, & Kobe B (2008) Predikin and PredikinDB:  
544 a computational framework for the prediction of protein kinase peptide specificity and an  
545 associated database of phosphorylation sites. *BMC Bioinformatics* 9:245.
- 546 33. Safaei J, Manuch J, Gupta A, Stacho L, & Pelech S (2011) Prediction of 492 human protein  
547 kinase substrate specificities. *Proteome Sci* 9 Suppl 1:S6.
- 548 34. Hanover JA, *et al.* (2005) A *Caenorhabditis elegans* model of insulin resistance: altered  
549 macronutrient storage and dauer formation in an OGT-1 knockout. *Proc Natl Acad Sci U S A*  
550 102(32):11266-11271.
- 551 35. Song M, *et al.* (2008) o-GlcNAc transferase is activated by CaMKIV-dependent  
552 phosphorylation under potassium chloride-induced depolarization in NG-108-15 cells. *Cell*  
553 *Signal* 20(1):94-104.
- 554 36. Dias WB, Cheung WD, Wang Z, & Hart GW (2009) Regulation of calcium/calmodulin-  
555 dependent kinase IV by O-GlcNAc modification. *J Biol Chem* 284(32):21327-21337.
- 556 37. Satterlee JS, Ryu WS, & Sengupta P (2004) The CMK-1 CaMKI and the TAX-4 Cyclic  
557 nucleotide-gated channel regulate thermosensory neuron gene expression and function in *C.*  
558 *elegans*. *Curr Biol* 14(1):62-68.
- 559 38. Hook S & Means A (2001) Ca<sup>2+</sup>/CaM-Dependent Kinases: From Activation to Function.  
560 *Annual Reviews in Pharmacology and Toxicology*.
- 561 39. Golks A, Tran TT, Goetschy JF, & Guerini D (2007) Requirement for O-linked N-  
562 acetylglucosaminyltransferase in lymphocytes activation. *EMBO J* 26(20):4368-4379.
- 563 40. Rexach JE, Clark PM, & Hsieh-Wilson LC (2008) Chemical approaches to understanding O-  
564 GlcNAc glycosylation in the brain. *Nat Chem Biol* 4(2):97-106.
- 565 41. Kreppel LK, Blomberg MA, & Hart GW (1997) Dynamic glycosylation of nuclear and  
566 cytosolic proteins. Cloning and characterization of a unique O-GlcNAc transferase with  
567 multiple tetratricopeptide repeats. *J Biol Chem* 272(14):9308-9315.



- 568 42. Gao X, Ikuta K, Tajima M, & Sairenji T (2001) 12-O-tetradecanoylphorbol-13-acetate induces  
569 Epstein-Barr virus reactivation via NF-kappaB and AP-1 as regulated by protein kinase C and  
570 mitogen-activated protein kinase. *Virology* 286(1):91-99.
- 571 43. Cole RN & Hart GW (2001) Cytosolic O-glycosylation is abundant in nerve terminals. *J*  
572 *Neurochem* 79(5):1080-1089.
- 573 44. Akimoto Y, *et al.* (2003) Localization of the O-GlcNAc transferase and O-GlcNAc-modified  
574 proteins in rat cerebellar cortex. *Brain Res* 966(2):194-205.
- 575 45. Lubas WA, Frank DW, Krause M, & Hanover JA (1997) O-Linked GlcNAc transferase is a  
576 conserved nucleocytoplasmic protein containing tetratricopeptide repeats. *J Biol Chem*  
577 272(14):9316-9324.
- 578 46. Lee J, Kim KY, & Paik YK (2010) Regulation of Dauer formation by O-GlcNAcylation in  
579 *Caenorhabditis elegans*. *J Biol Chem* 285(5):2930-2939.
- 580 47. Rahman MM, *et al.* (2010) Intracellular protein glycosylation modulates insulin mediated  
581 lifespan in *C.elegans*. *Aging (Albany NY)* 2(10):678-690.
- 582 48. Mondoux MA, *et al.* (2011) O-linked-N-acetylglucosamine cycling and insulin signaling are  
583 required for the glucose stress response in *Caenorhabditis elegans*. *Genetics* 188(2):369-382.
- 584 49. Wang P, *et al.* (2012) O-GlcNAc cycling mutants modulate proteotoxicity in *Caenorhabditis*  
585 *elegans* models of human neurodegenerative diseases. *Proc Natl Acad Sci U S A*  
586 109(43):17669-17674.
- 587 50. Rexach JE, *et al.* (2012) Dynamic O-GlcNAc modification regulates CREB-mediated gene  
588 expression and memory formation. *Nat Chem Biol* 8(3):253-261.
- 589 51. Din N, *et al.* (2010) The function of GluR1 and GluR2 in cerebellar and hippocampal LTP and  
590 LTD is regulated by interplay of phosphorylation and O-GlcNAc modification. *J Cell Biochem*  
591 109(3):585-597.

- 592 52. Tallent MK, *et al.* (2009) In vivo modulation of O-GlcNAc levels regulates hippocampal  
593 synaptic plasticity through interplay with phosphorylation. *J Biol Chem* 284(1):174-181.
- 594 53. Lehner B (2011) Molecular mechanisms of epistasis within and between genes. *Trends Genet*  
595 27(8):323-331.
- 596 54. Lamarre-Vincent N & Hsieh-Wilson LC (2003) Dynamic glycosylation of the transcription  
597 factor CREB: a potential role in gene regulation. *J Am Chem Soc* 125(22):6612-6613.
- 598 55. Reason AJ, *et al.* (1992) Localization of O-GlcNAc modification on the serum response  
599 transcription factor. *J Biol Chem* 267(24):16911-16921.
- 600 56. Tai HC, Khidekel N, Ficarro SB, Peters EC, & Hsieh-Wilson LC (2004) Parallel identification  
601 of O-GlcNAc-modified proteins from cell lysates. *J Am Chem Soc* 126(34):10500-10501.
- 602 57. Kreppel LK & Hart GW (1999) Regulation of a cytosolic and nuclear O-GlcNAc transferase.  
603 Role of the tetratricopeptide repeats. *J Biol Chem* 274(45):32015-32022.
- 604 58. Alfaro JF, *et al.* (2012) Tandem mass spectrometry identifies many mouse brain O-  
605 GlcNAcylated proteins including EGF domain-specific O-GlcNAc transferase targets. *Proc*  
606 *Natl Acad Sci U S A* 109(19):7280-7285.
- 607 59. Butkinaree C, Park K, & Hart GW (2010) O-linked beta-N-acetylglucosamine (O-GlcNAc):  
608 Extensive crosstalk with phosphorylation to regulate signaling and transcription in response to  
609 nutrients and stress. *Biochim Biophys Acta* 1800(2):96-106.
- 610 60. Perez-Perez JM, Candela H, & Micol JL (2009) Understanding synergy in genetic interactions.  
611 *Trends Genet* 25(8):368-376.
- 612 61. Chen X *et al.* (2015). Identification of Nonviable Genes Affecting Touch Sensitivity in  
613 *Caenorhabditis elegans* Using Neuronally Enhanced Feeding RNA Interference. *G3: Genes/*  
614 *Genomes/ Genetics*, 5(3), 467-475.
- 615 62. Chalfie M, & Sulston J (1981). Developmental genetics of the mechanosensory neurons of  
616 *Caenorhabditis elegans*. *Developmental biology*, 82(2), 358-370.

- 617 63. Rankin CH, Abrams T, Barry RJ, Bhatnagar S, Clayton DF, Colombo J, & McSweeney FK  
618 (2009) Habituation revisited: an updated and revised description of the behavioral  
619 characteristics of habituation. *Neurobiol Learn Mem*, 92(2):135-138.
- 620 64. Brenner S (1974) The genetics of *Caenorhabditis elegans*. *Genetics* 77(1):71-94.
- 621 65. Thompson O, *et al.* (2013) The million mutation project: a new approach to genetics in  
622 *Caenorhabditis elegans*. *Genome Res* 23(10):1749-1762.
- 623 66. Swierczek NA, Giles AC, Rankin CH, & Kerr RA (2011) High-throughput behavioral analysis  
624 in *C. elegans*. *Nat Methods* 8(7):592-598.

625

626

627

628

629

630 **Table 1.** Summary of mechanosensory and learning phenotypes for predicted CMK-1  
 631 phosphorylation targets.  
 632

| Human Protein | <i>C. elegans</i> gene | allele | Reversal Distance   |       |                               |       |
|---------------|------------------------|--------|---------------------|-------|-------------------------------|-------|
|               |                        |        | Initial tap p-value | score | habituation asymptote p-value | score |
| PRKD1         | <i>dkf-2</i>           | ok1704 | NS                  |       | < 0.01                        | --    |
| ARF6          | <i>arf-1.2</i>         | ok796  | < 0.001             | ---   | < 0.001                       | ---   |
| PRKCG         | <i>pkc-2</i>           | ok328  | < 0.01              | ++    | NS                            |       |
| PDK4          | <i>pdhk-2</i>          | tm3075 | 0.05                | -     | NS                            |       |
| PRKAR1B       | <i>kin-2</i>           | ce179  | < 0.001             | ---   | NS                            |       |
| CHRFAM7A      | <i>acr-16</i>          | ok789  | < 0.001             | +++   | NS                            |       |
| MYO1F         | <i>hum-1</i>           | ok634  | NS                  |       | NS                            |       |
| PRKCH         | <i>pkc-1</i>           | ok563  | NS                  |       | NS                            |       |
| CHD3          | <i>chd-3</i>           | ok1651 | < 0.001             | ---   | < 0.001                       | ---   |
| RAPGEF3       | <i>epac-1</i>          | ok655  | NS                  |       | NS                            |       |
| STX6          | <i>syx-6</i>           | tm4733 | < 0.001             | ---   | NS                            |       |
| ADRBK2        | <i>grk-2</i>           | rt97   | < 0.01              | ++    | NS                            |       |
| PLXNA3        | <i>plx-2</i>           | ev773  | < 0.01              | --    | NS                            |       |
| RAB30         | <i>rab-30</i>          | tm2653 | NS                  |       | NS                            |       |
| CNGA2         | <i>tax-4</i>           | p678   | < 0.001             | ---   | NS                            |       |
| PDE7A         | <i>pde-4</i>           | ce268  | < 0.001             | ---   | NS                            |       |
| HDAC4         | <i>hda-4</i>           | ok518  | NS                  |       | < 0.05                        | +     |
| HUNK          | <i>par-1</i>           | ok2001 | < 0.001             | +++   | NS                            |       |
| SYT6          | <i>snt-1</i>           | ad596  | < 0.001             | +++   | < 0.001                       | +++   |
| CHP2          | <i>ncs-1</i>           | qa406  | NS                  |       | NS                            |       |
| SPAG9         | <i>unc-16</i>          | e109   | < 0.001             | ---   | < 0.001                       | ---   |
| OGT           | <i>ogt-1</i>           | ok430  | < 0.001             | +++   | < 0.001                       | +++   |

## Figure Legends

### **Figure 1. CMK-1, but not CKK-1, modulates response to mechanosensory stimuli and**

**habituation.** Response to mechanical stimuli and tap habituation of wild-type, *cmk-1(oy21)*, and *ckk-1(ok1033)* mutants. (A) Reversal distance habituation to tap stimuli presented at a 60s ISI. (B) Reversal distance habituation to tap stimuli presented at a 10s ISI. (C) Response to mechanical stimuli and tap habituation of wild-type, *cmk-1(oy21)*, and genetic rescue with CMK-1 cDNA in *cmk-1(oy21)* mutants. Error bars represent 95% confidence intervals (Clopper–Pearson method for binomial data).

### **Figure 2. CMK-1 Thr-179 plays a role in wild-type habituation.**

Response to mechanical stimuli and tap habituation of wild-type, *cmk-1(oy21)*, *cmk-1(oy21/+)*, and *cmk-1(oy21/gk691866)* worms when stimuli are presented at a 60s ISI and reversal distance is measured. Error bars represent 95% confidence intervals.

### **Figure 3. Genetic dissociation of initial response and habituation phenotypes.**

(A) CMK-1::GFP fusion proteins localize to the cytoplasm in cell bodies and neurites and are largely excluded from the nucleus. (B) Reversal response distance and habituation of wild-type, and *cmk-1(pg58)* mutants to repeated tap stimuli presented at a 60s ISI.

### **Figure 4. Mechanosensory and habituation phenotypes of predicted CMK-1 downstream**

**phosphorylation targets.** Venn diagram grouping genes whose mutant alleles showed similar behavioral phenotypes when given 30 taps at a 60s ISI. Grouping was based on the statistical analysis presented in Table 1.

### **Figure 5. OGT-1 modulates response to mechanical stimuli and habituation.**

Response to mechanical stimuli and tap habituation of wild-type, and *ogt-1(ok430)* mutants. (A) Reversal distance habituation to tap stimuli presented at a 60s ISI. (B) Reversal distance habituation to tap stimuli

presented at a 10s ISI. (C) Mechanosensory neurons, ALMs and AVM, (visualized with *Pmec-7::mRFP*) express OGT-1 (visualized with *Pogt-1::GFP*). Anterior is at left.

**Figure 6. *cmk-1* and *ogt-1* function in a genetic network.** Response to mechanical stimuli and tap habituation of wild-type, *cmk-1*, *ogt-1* and *cmk-1;ogt-1* double mutants when stimuli are presented at a 60s ISI. (A) Reversal distance habituation to tap stimuli. (B) Reversal speed habituation to tap stimuli. (C) Reversal duration habituation. Error bars represent 95% confidence intervals.

**Figure 7. CMK-1 and OGT-1 functional interaction model.** Proposed functional model that explains the genetic interaction between *cmk-1* and *ogt-1* mutants. Model aspects supported by data from this study are represented in blue.

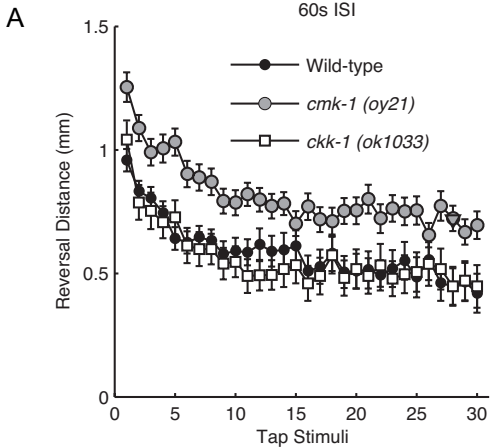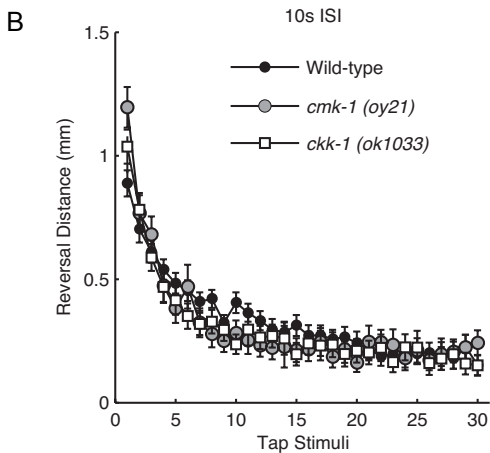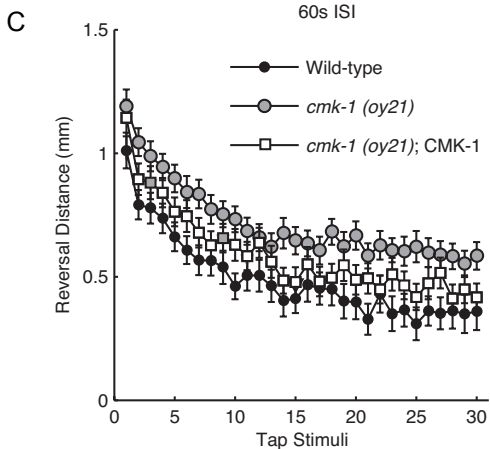

60s ISI

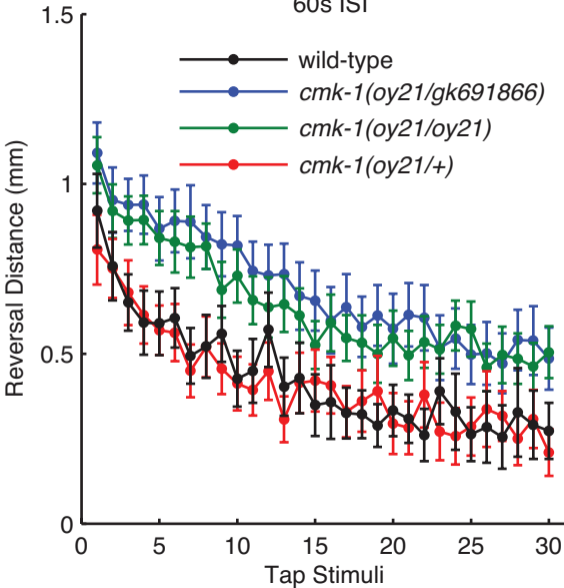



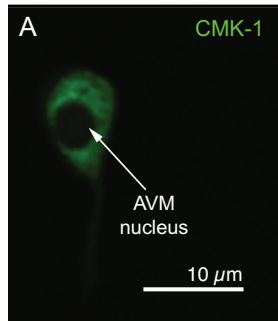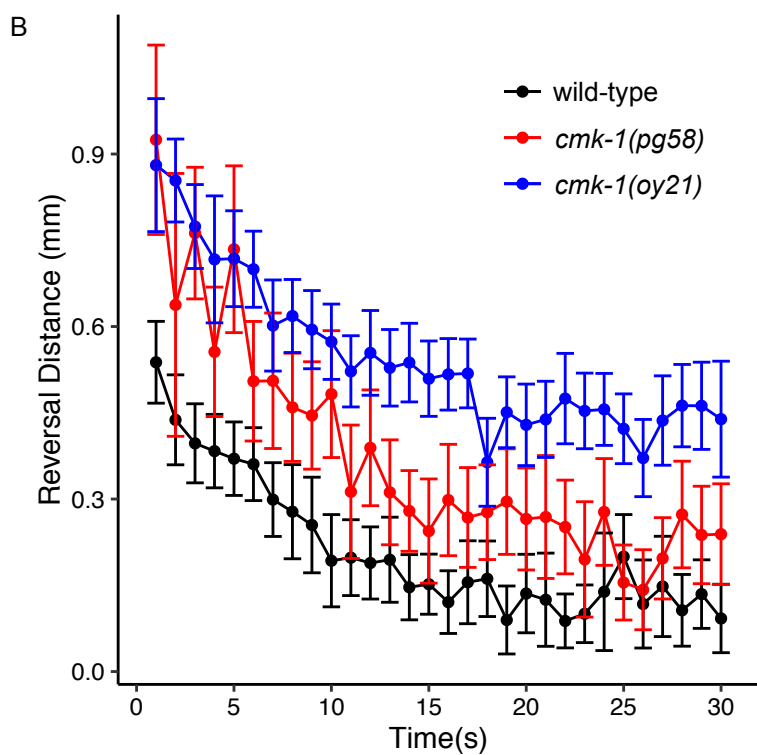

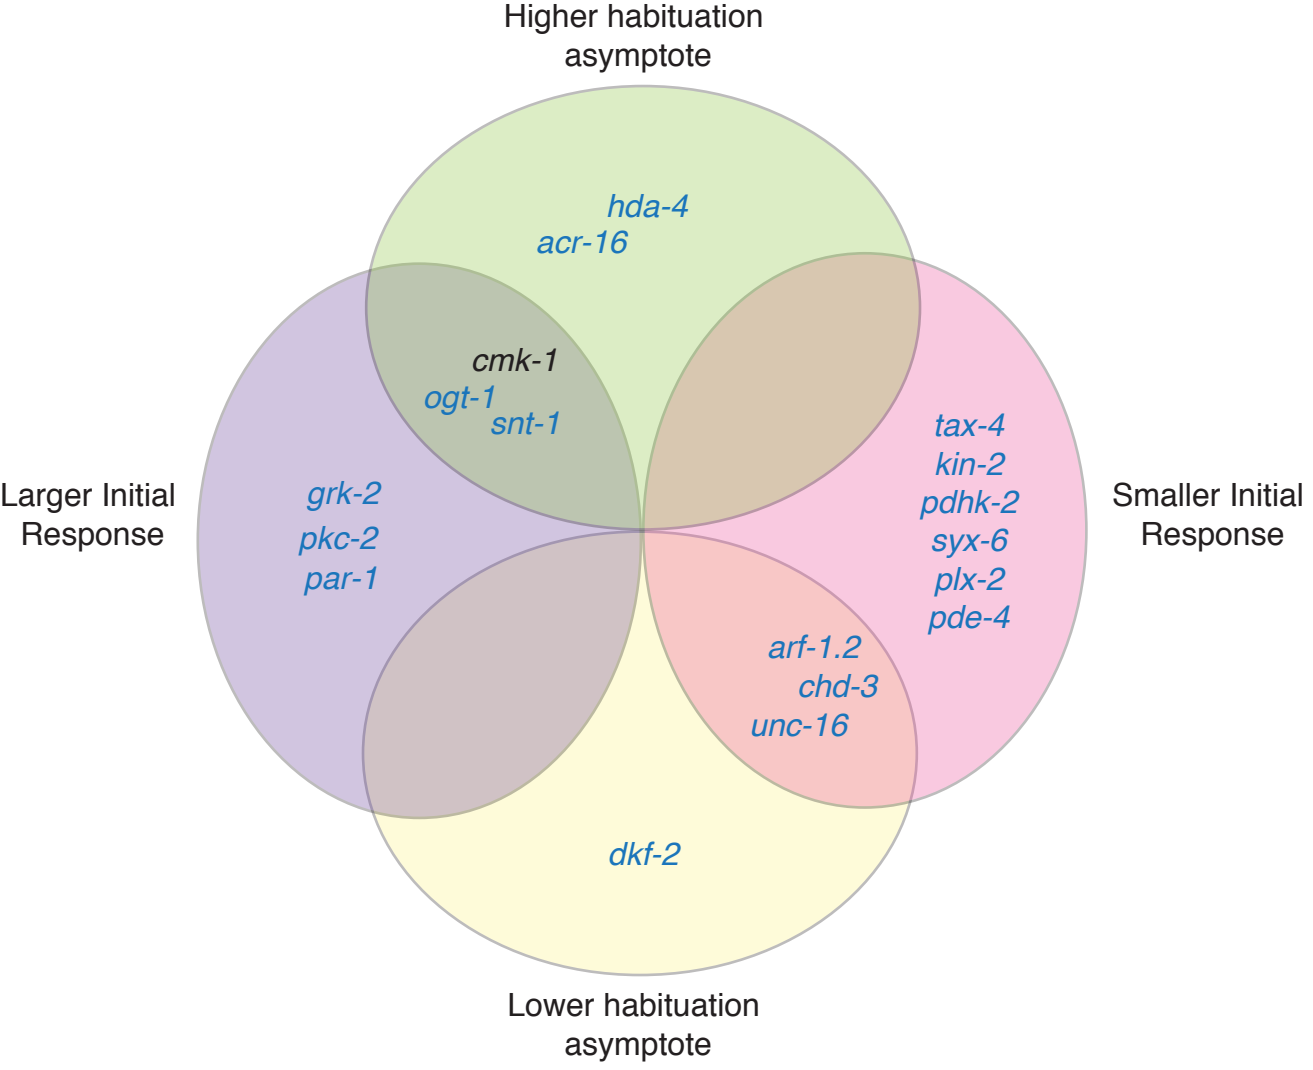

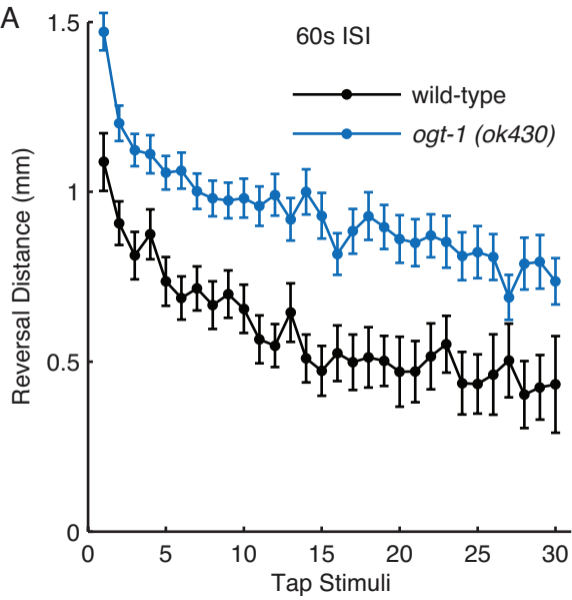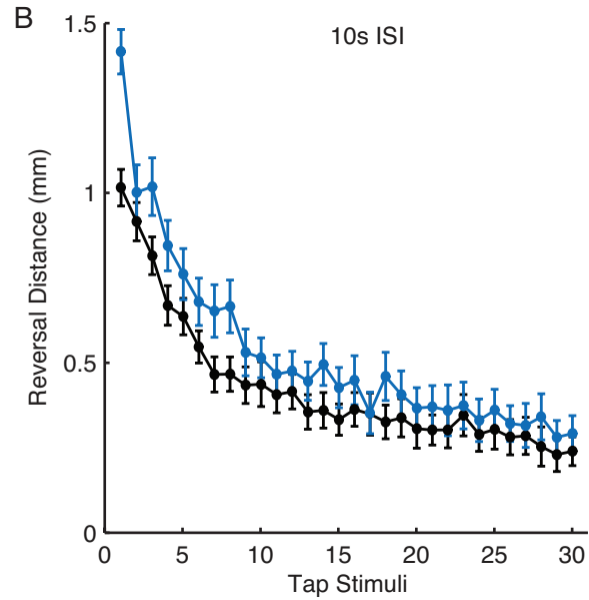

**C**

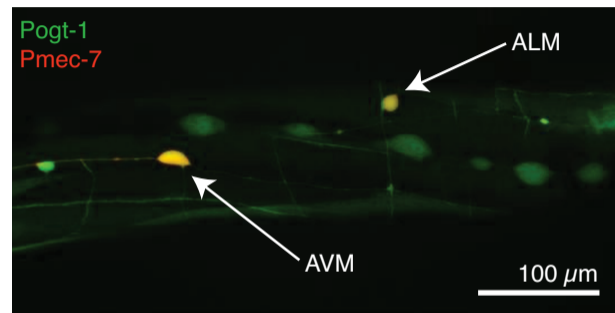

60s ISI

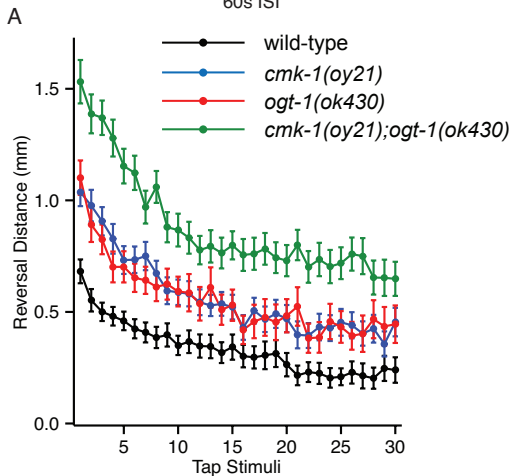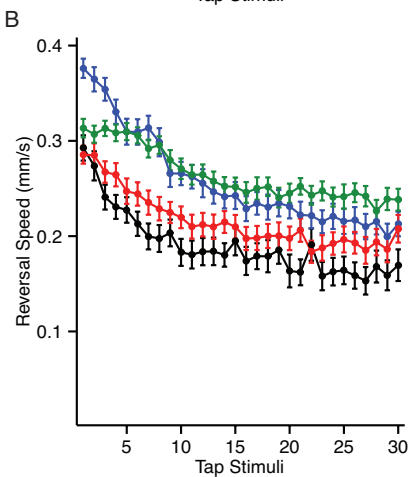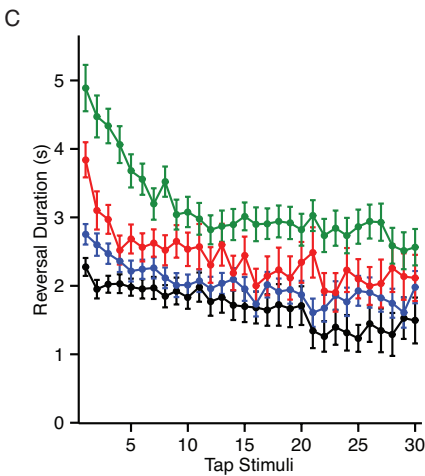

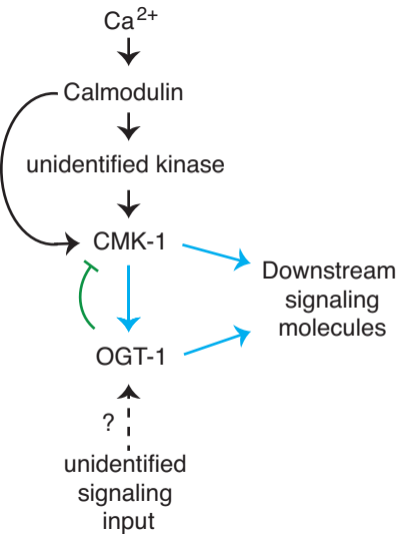

Source: https://www.biorxiv.org/content/10.1101/115972v1.full.pdf
